# Supplementary material for: Force-Induced Strengthening of the Interaction between Staphylococcus aureus Clumping Factor B and Loricrin
Source: PubMed Central journal article supplement (PMC5717387; doi:10.1128/mbio.01748-17), 2017-12-05
Supplement: mbo006173618sf1.pdf [file mbo006173618sf1.pdf]

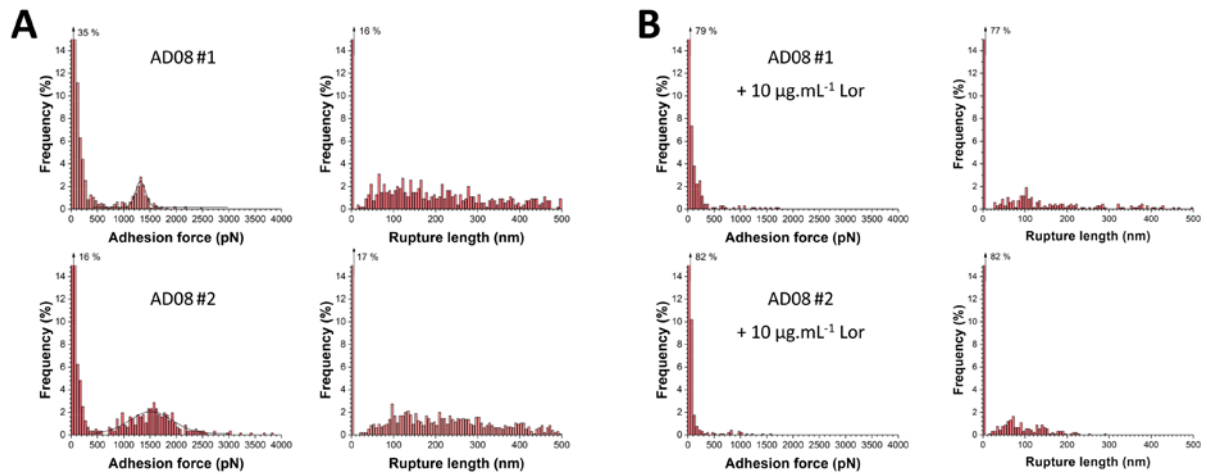

**Fig. S1. Blocking experiments demonstrate the specificity of the ClfB-Lor interaction, as measured by single-molecule force spectroscopy. (A)** Adhesion force and rupture length histograms obtained by recording force curves in PBS across the surface of two AD08 cells using tips labelled with Lor. **(B)** Data obtained on the same cells 15 min after injection of free Lor at a final concentration of  $10 \mu\text{g.mL}^{-1}$ . All curves were obtained using a contact time of 100 ms, a maximum applied force of 250 pN, and approach and retraction speeds of  $1,000 \text{ nm.s}^{-1}$ . (th Lor and L2v).
