# Supplementary material for: Force-Induced Strengthening of the Interaction between Staphylococcus aureus Clumping Factor B and Loricrin
Source: PubMed Central journal article supplement (PMC5717387; doi:10.1128/mbio.01748-17), 2017-12-05
Supplement: mbo006173618sf2.pdf [file mbo006173618sf2.pdf]

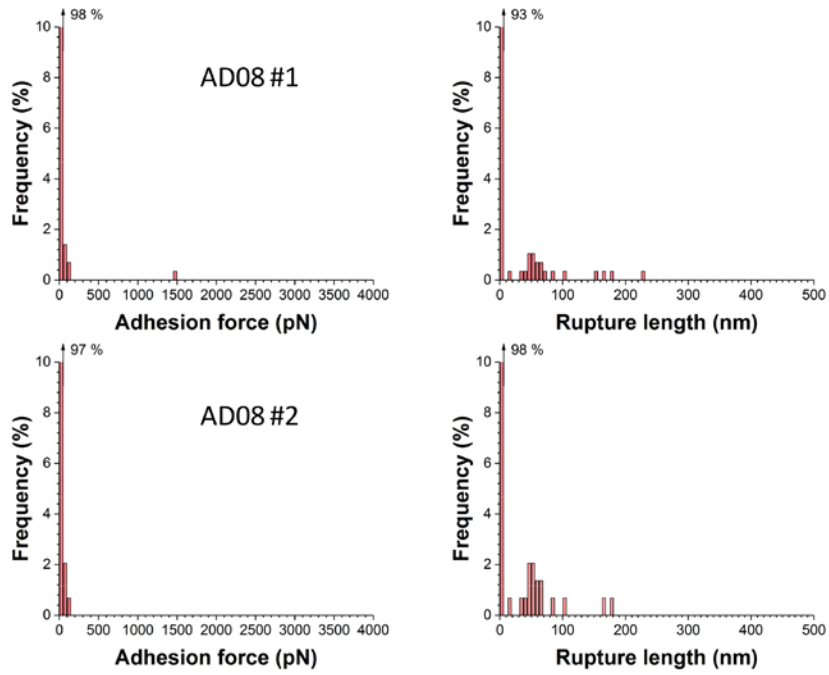

**Fig. S2. Decreasing the Lor density on the AFM tip shows that single-molecules are probed.**

Adhesion force and rupture length histograms obtained by recording force curves in PBS across the surface of two AD08 cells using Lor-tips functionalized at very low density (16-mercaptopdodecahexanoic acid at 1% instead of 10%). The adhesion frequency is dramatically decreased, without showing intermediate forces.
