# Supplementary material for: Force-Induced Strengthening of the Interaction between Staphylococcus aureus Clumping Factor B and Loricrin
Source: PubMed Central journal article supplement (PMC5717387; doi:10.1128/mbio.01748-17), 2017-12-05
Supplement: mbo006173618sf3.pdf [file mbo006173618sf3.pdf]

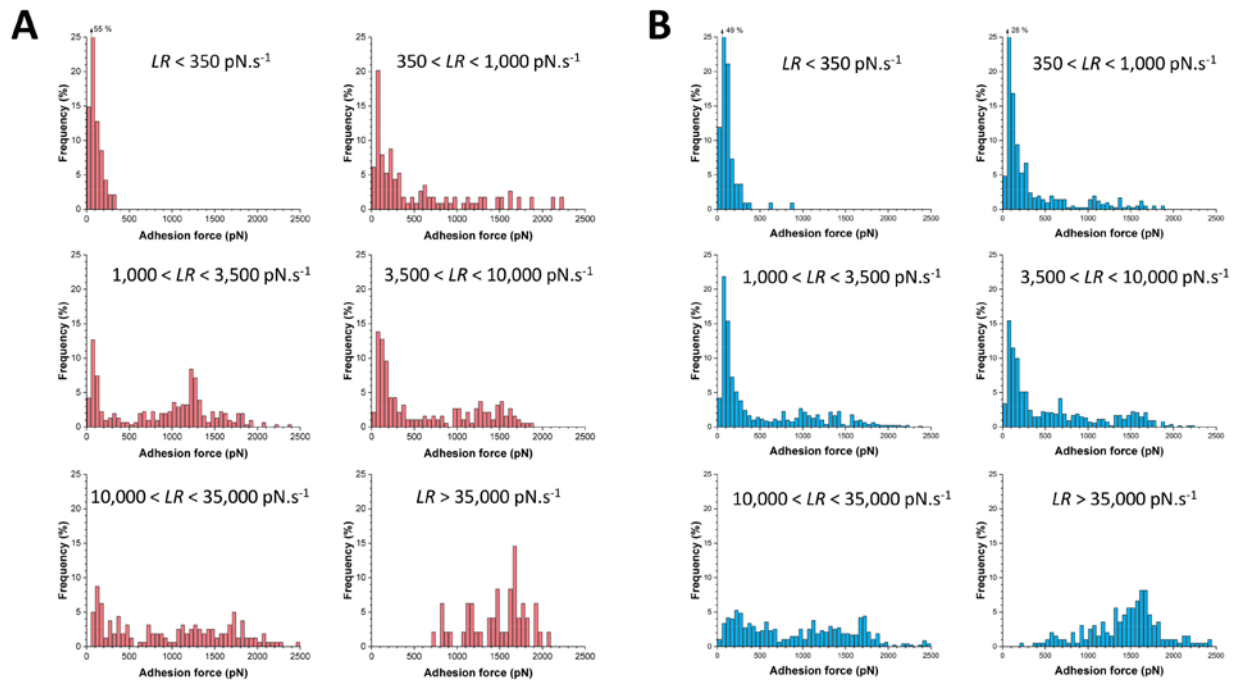

**Fig. S3. The probability of forming strong bonds increases with the loading rate. (A, B)** Adhesion forces were measured at various loading rates ( $LR$ s) between AD08 cells and Lor- or L2v-tips. Small ranges of  $LR$ s were binned and the distribution of the Lor (A) and L2v (B) forces plotted as histograms (data pooled from 5 independent experiments for both Lor and L2v).
